# Supplementary material for: Postoperative Imaging and Tumor Marker Surveillance in Resected Pancreatic Cancer
Source: MDPI journal article supplement (doi:10.3390/jcm8081115), 2019-07-27
Supplement: s1 [file s1]

**Table S1.** Time from surgery to start of adjuvant chemotherapy in four groups.

|                       |          | Symptom group | Imaging group | Marker group | Intense group | P      |
|-----------------------|----------|---------------|---------------|--------------|---------------|--------|
|                       |          | (n=43)        | (n=21)        | (n=42)       | (n=74)        | value  |
| Time (weeks)          | §        | 10.7          | 10.0          | 7.0          | 6.9           | 0.439¶ |
| n=                    | > 8weeks | 2             | 2             | 4            | 6             |        |
| n=                    | ≤ 8weeks | 1             | 1             | 11           | 27            |        |
|                       | No       | 40            | 18            | 27           | 41            |        |
|                       | adjuvant |               |               |              |               |        |
| Range (weeks)         |          | 4.0-28.6      | 6.0-13.6      | 3.4-13.6     | 4.0-12.3      |        |
| ¶ Kruskal-Wallis test |          |               |               |              |               |        |
| § Median value        |          |               |               |              |               |        |

**Table S2.** Post-operative follow-up patter in four groups.

|                         |          | Symptom group<br>(n=44) |       | Imaging group<br>(n=21) |       | Marker group<br>(n=42) |       | Intense group<br>(n=74) |       |
|-------------------------|----------|-------------------------|-------|-------------------------|-------|------------------------|-------|-------------------------|-------|
|                         | Months   | N                       | %     | N                       | %     | N                      | %     | N                       | %     |
| <b>Imaging interval</b> | Never    | 2                       | 4.5%  | 0                       | 0%    | 4                      | 9.5%  | 0                       | 0%    |
|                         | ≤ 4      | 0                       | 0%    | 21                      | 100%  | 0                      | 0%    | 74                      | 100%  |
|                         | 4 to ≤6  | 12                      | 27.3% | 0                       | 0%    | 17                     | 40.5% | 0                       | 0%    |
|                         | 6 to ≤12 | 18                      | 40.9% | 0                       | 0%    | 17                     | 40.5% | 0                       | 0%    |
|                         | > 12     | 12                      | 27.3% | 0                       | 0%    | 4                      | 9.5%  | 0                       | 0%    |
| <b>CA19-9 interval</b>  | Never    | 11                      | 25.0% | 9                       | 42.9% | 0                      | 0%    | 1                       | 1.4%  |
|                         | ≤ 4      | 0                       | 0%    | 0                       | 0%    | 40                     | 95.2% | 73                      | 98.6% |
|                         | 4 to ≤6  | 16                      | 36.4% | 9                       | 42.9% | 1                      | 2.4%  | 0                       | 0%    |
|                         | 6 to ≤12 | 14                      | 31.8% | 3                       | 14.3% | 1                      | 2.4%  | 0                       | 0%    |
|                         | > 12     | 3                       | 6.8%  | 0                       | 0%    | 0                      | 0%    | 0                       | 0%    |
| <b>CEA interval</b>     | Never    | 11                      | 25.0% | 11                      | 52.4% | 4                      | 9.5%  | 8                       | 10.8% |
|                         | ≤ 4      | 0                       | 0%    | 0                       | 0%    | 26                     | 61.9% | 59                      | 79.7% |
|                         | 4 to ≤6  | 14                      | 31.8% | 6                       | 28.6% | 9                      | 21.4% | 3                       | 4.1%  |
|                         | 6 to ≤12 | 15                      | 34.1% | 4                       | 19.0% | 2                      | 4.8%  | 4                       | 5.4%  |
|                         | > 12     | 4                       | 9.1%  | 0                       | 0%    | 1                      | 2.4%  | 0                       | 0%    |
